# Supplementary material for: The molecular characterization of porcine egg precursor cells
Source: PubMed Central journal article supplement (PMC5609938; doi:10.18632/oncotarget.18833), 2017-06-28
Supplement: oncotarget-08-63484-s001.pdf [file oncotarget-08-63484-s001.pdf]

# The molecular characterization of porcine egg precursor cells

## SUPPLEMENTARY MATERIALS

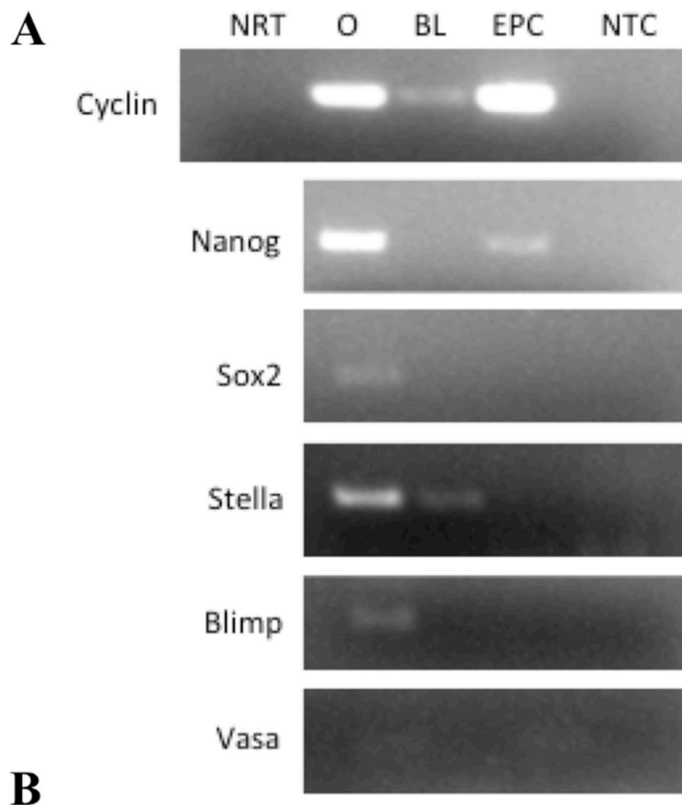

Sus scrofa DEAD-box helicase 4 (DDX4), mRNA

Sequence ID: [NM\\_001291682.1](#) Length: 2235 Number of Matches: 1

[▶ See 1 more title\(s\)](#)

Range 1: 1413 to 1553 [GenBank](#) [Graphics](#) [▼ Next Match](#) [▲ Previous Match](#)

| Score         | Expect                                                        | Identities                                | Gaps      | Strand     |
|---------------|---------------------------------------------------------------|-------------------------------------------|-----------|------------|
| 254 bits(137) | 5e-64                                                         | 140/141(99%)                              | 1/141(0%) | Plus/Minus |
| Query 2       | TGCTCCG-CCACTTGTC                                             | CAACAGCAACAACAAATAATTCGATTTTAAAACTCCCCAGC | 60        |            |
| Sbjct 1553    | TGCTCCGCCCACTTGTC                                             | CAACAGCAACAACAAATAATTCGATTTTAAAACTCCCCAGC | 1494      |            |
| Query 61      | CAACCTTTGAATTTCTTCTGGAAAAGTTGCACTAAACATAAGTGTTTGACGTTGTTTCCTT | 120                                       |           |            |
| Sbjct 1493    | CAACCTTTGAATTTCTTCTGGAAAAGTTGCACTAAACATAAGTGTTTGACGTTGTTTCCTT | 1434                                      |           |            |
| Query 121     | TGATGGCATTCCCTGGGCAGGA                                        | 141                                       |           |            |
| Sbjct 1433    | TGATGGCATTCCCTGGGCAGGA                                        | 1413                                      |           |            |

**Supplementary Data 1: RT-PCR for *Cyclin*, *Nanog*, *Sox2*, *Stella*.** NRT = cDNA synthesis no reverse transcriptase control; O = oocyte; BL = blastocyst; EPC = egg precursor cells; NTC = PCR no template control (A), and NCBI Blast result to confirm the expression of *Ddx4* (B).

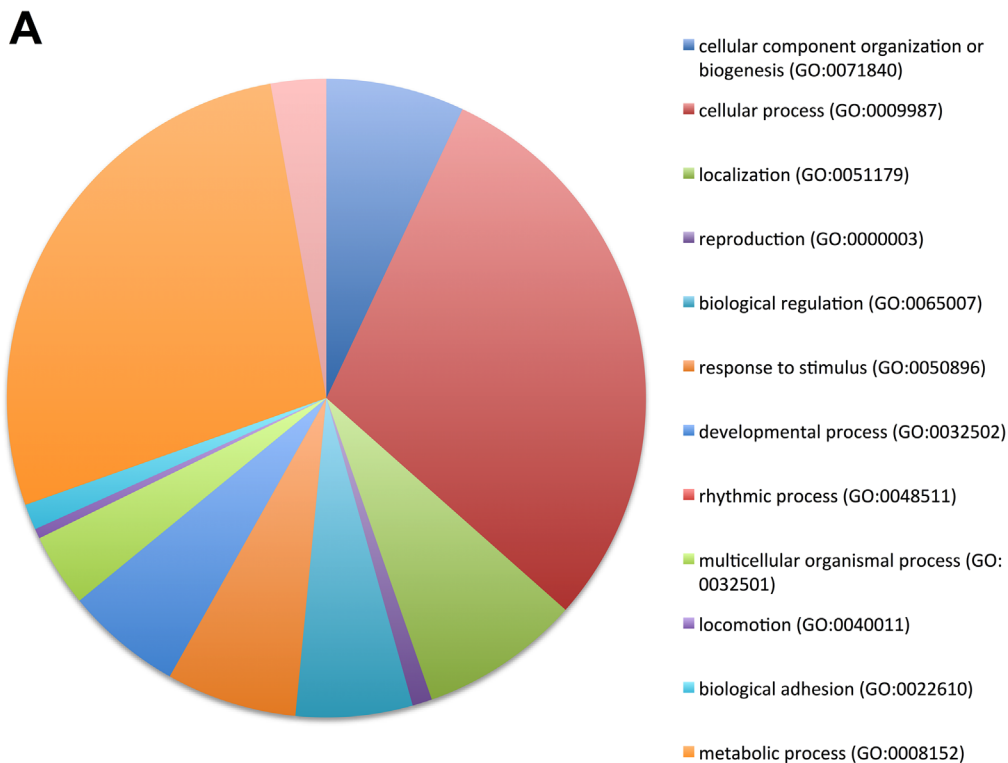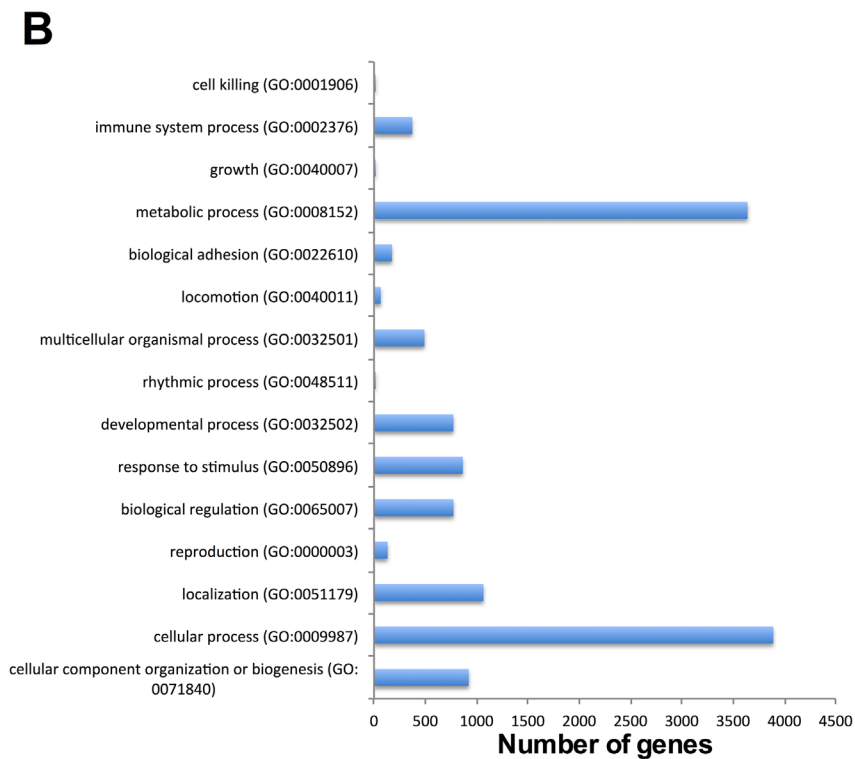

**Supplementary Data 2:** Top biological processes, as determined by the PANTHER classification system from the Gene Ontology Consortium database (A), and the number of genes involved (B).

**Supplementary Data 3: Top canonical pathways, as determined by IPA**

See Supplementary File 1

**Supplementary Data 4: IPA summary of top biological functions**

See Supplementary File 2

**Supplementary Data 5: Upstream regulators, as determined by IPA**

See Supplementary File 3

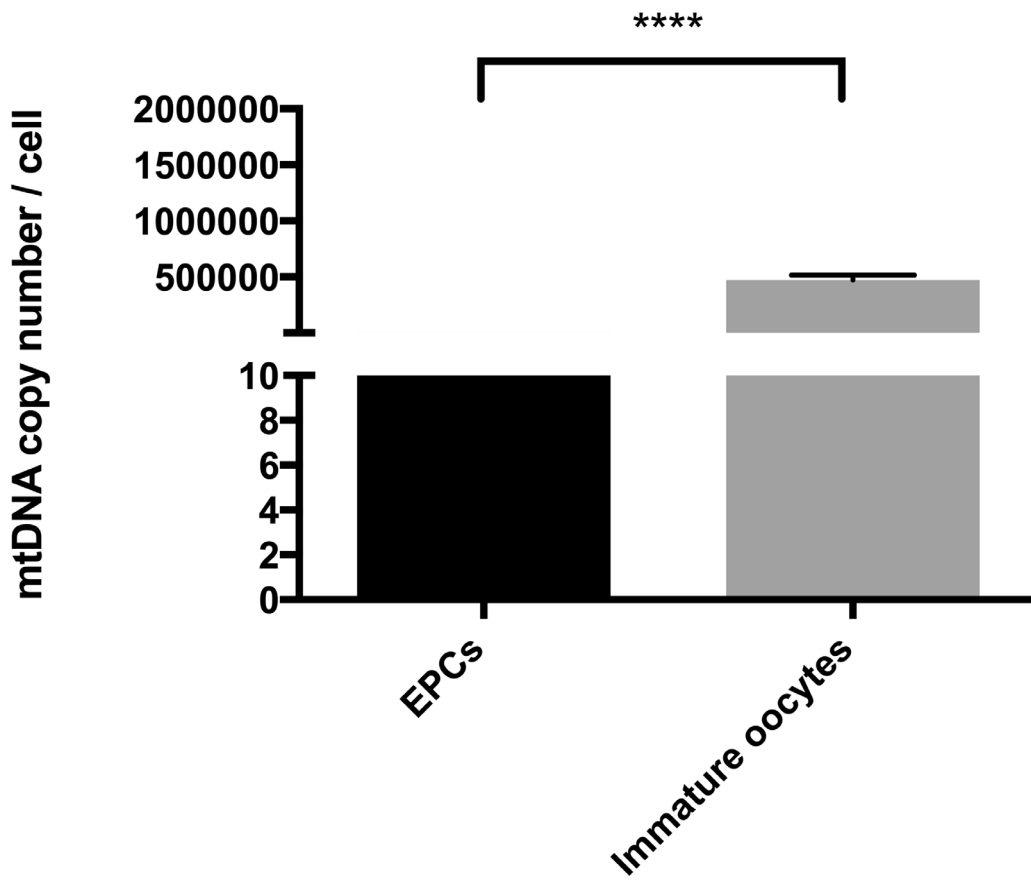

Supplementary Data 6: mtDNA copy number of EPCs compared with immature oocytes.

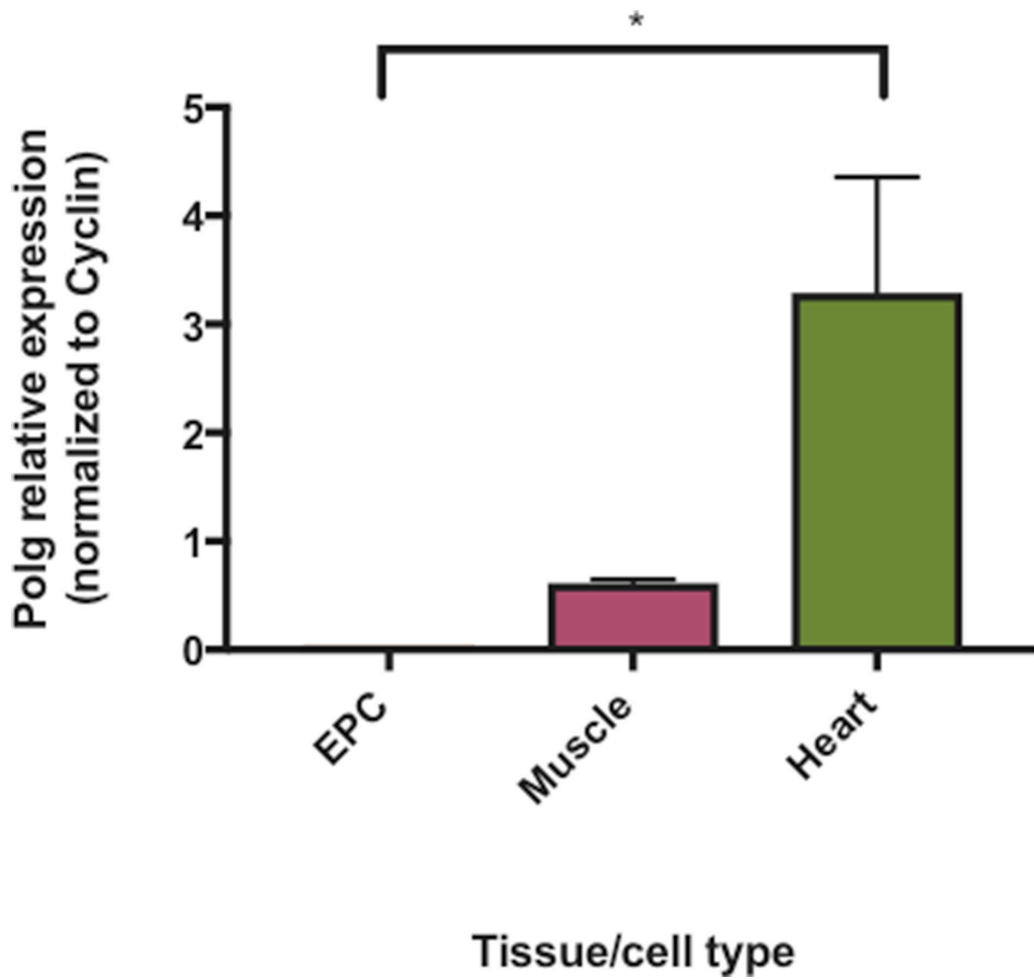

Supplementary Data 7: *Polg* gene expression. Values represent relative gene expression to *Cyclin* for each tissue or cell type.

**Supplementary Table 1: Primer sequences, annealing temperatures and product sizes for PCR or qPCR reactions**

| Gene symbol    | Accession number | Forward primer (5' to 3')  | Reverse primer (5' to 3')  | Annealing temp | Product length |
|----------------|------------------|----------------------------|----------------------------|----------------|----------------|
| mtDNA (Long A) | AJ002189         | ATAGGACTCGAACCTAAACCTGAGAA | GACGAATAGTGCTACGGGAATGAATA | 60             | 8272           |
| mtDNA (Long B) | AJ002189         | TTCTACCACTACTACTACTGACCTTA | AGAATATAGGAGGTTGATGATGATGG | 60             | 9262           |
| mtDNA          | AJ002189         | CTCAACCCTAGCAGAAACCA       | TTAGTTGGTCGTATCGGAATCG     | 60             | 296            |
| CYCLIN         | NM_001170768.1   | GTCGTGAAGTCACTGGAAAC       | CCATCTGCCTGATTTGGTAC       | 60             | 276            |
| SOX2           | NM_001123197.1   | AACCAGAAGAACAGCCCAGA       | CGGGGCCGGTATTTATAATC       | 58             | 246            |
| OCT4           | NM_001113060     | CACCTCAGGTCGGAGTGG         | AGCTTGGCAAATTGTTCTGA       | 55             | 226            |
| Nanog          | NM_001129971.1   | AGGGCTCAGCCAGTACAGAA       | TGATTTCCCCAGCAGTTTC        | 60             | 316            |
| DPPA3          | XM_005655688.2   | CCCGCCTTCAATCTGTCTCC       | TCGCCGAACCGTGTATCGAA       | 58             | 219            |
| PRDM1          | XM_013986966.1   | CAGTGCCGTGAAGTTTCCA        | AAGGATGCCTCTGCCTGAAC       | 56             | 186            |
| DDX4           | NM_001291682.1   | CCTGCCCAGGAATGCCATCA       | ACTGGCCAACCTGGAGAATGGT     | 55             | 180            |
| POLG           | XM_001927064.4   | CTTACAACGAGGTGGATGTC       | GGGAGCTGATACGTTTATGG       | 60             | 219            |
